# Supplementary material for: Further Evidence on Trace Element Imbalances in Haemodialysis Patients—Paired Analysis of Blood and Serum Samples
Source: MDPI journal article supplement (doi:10.3390/nu15081912), 2023-04-15
Supplement: s1 [file s1]

Table S1. Whole blood and serum quality control (µg/L).

| Whole Blood Seronorm L1 – lot 1406263 |              |      |             |             |             |             |             |           |      |     |             |             |            |
|---------------------------------------|--------------|------|-------------|-------------|-------------|-------------|-------------|-----------|------|-----|-------------|-------------|------------|
|                                       | Li           | B    | Mn          | Co          | Ni          | Cu          | Zn          | Se        | Rb   | Sr  | Mo          | Cd          | Pb         |
| <b>n</b>                              | 8            | 8    | 8           | 8           | 8           | 8           | 8           | 8         | 8    | 8   | 8           | 8           | 8          |
| <b>Mean</b>                           | 0.39         | 162  | 19.3        | 0.24        | 1.41        | 600         | 3610        | 66        | 1408 | 39  | 0.75        | 0.28        | 9.8        |
| <b>SD</b>                             | 0.06         | 16   | 1.6         | 0.05        | 0.28        | 31          | 286         | 5         | 40   | 2   | 0.07        | 0.03        | 0.2        |
| <b>Analytical Value</b>               | 0.36         | 180  | 18.4        | 0.20        | 1.38        | 640         | 4300        | 60        | 1350 | 37  | 0.51        | 0.28        | 9.9        |
| <b>95% CI</b>                         | -            | -    | 14.7 – 22.1 | 0.12 – 0.28 | 1.10 – 1.66 | 510 – 760   | 3400 – 5200 | 48 – 72   | -    | -   | 0.41 – 0.61 | 0.17 – 0.40 | 7.9 – 11.9 |
| Whole Blood Seronorm L2 – lot 1406264 |              |      |             |             |             |             |             |           |      |     |             |             |            |
|                                       | Li           | B    | Mn          | Co          | Ni          | Cu          | Zn          | Se        | Rb   | Sr  | Mo          | Cd          | Pb         |
| <b>n</b>                              | 8            | 8    | 8           | 8           | 8           | 8           | 8           | 8         | 8    | 8   | 8           | 8           | 8          |
| <b>Mean</b>                           | 0.43         | 206  | 32.2        | 5.13        | 14.9        | 1217        | 7436        | 162       | 1412 | 39  | 5.09        | 5.02        | 298        |
| <b>SD</b>                             | 0.06         | 12   | 1.9         | 0.28        | 0.9         | 77          | 1178        | 13        | 39   | 3   | 0.18        | 0.38        | 9          |
| <b>Analytical Value</b>               | 0.33         | 158  | 31.4        | 5.18        | 15.9        | 1340        | 7100        | 161       | 1410 | 36  | 5.31        | 5.01        | 337        |
| <b>95% CI</b>                         | -            | -    | 25.1 – 37.7 | 4.13 – 6.22 | 12.7 – 19.1 | 1070 – 1600 | 5700 – 8500 | 128 – 193 | -    | -   | 4.24 – 6.37 | 4.00 – 6.02 | 269 – 405  |
| Whole Blood Seronorm L3 - 1509408     |              |      |             |             |             |             |             |           |      |     |             |             |            |
|                                       | Li           | B    | Mn          | Co          | Ni          | Cu          | Zn          | Se        | Rb   | Sr  | Mo          | Cd          | Pb         |
| <b>n</b>                              | 8            | 8    | 8           | 8           | 8           | 8           | 8           | 8         | 8    | 8   | 8           | 8           | 8          |
| <b>Mean</b>                           | 0.50         | 392  | 35.7        | 9.7         | 10.5        | 1820        | 8277        | 206       | 1326 | 42  | 7.1         | 9.1         | 344        |
| <b>SD</b>                             | 0.10         | 32   | 2.8         | 1.0         | 0.8         | 224         | 1470        | 43        | 67   | 4   | 0.5         | 0.8         | 43         |
| <b>Analytical Value</b>               | 0.73         | 379  | 33.3        | 10.3        | 11.0        | 2080        | 8060        | 198       | 1180 | 37  | 6.2         | 9.9         | 362        |
| <b>95% CI</b>                         | -            | -    | 26.6 – 39.9 | 8.3 – 12.4  | 8.8 – 13.3  | 1660 – 2050 | 6440 – 9680 | 158 – 238 | -    | -   | 4.9 – 7.4   | 7.9 – 11.9  | 289 – 434  |
| Serum Seronorm L1 – lot 1309438       |              |      |             |             |             |             |             |           |      |     |             |             |            |
|                                       | Li           | B    | Mn          | Co          | Ni          | Cu          | Zn          | Se        | Rb   | Sr  | Mo          | Cd          | Pb         |
| <b>n</b>                              | 3            | 3    | 3           | 3           | 3           | 3           | 3           | 3         | 3    | 3   | 3           | 3           | 3          |
| <b>Mean</b>                           | 4823         | 58   | 9.2         | 1.08        | 5.71        | 994         | 1008        | 86        | 4.5  | 88  | 0.93        | 0.13        | 0.39       |
| <b>SD</b>                             | 226          | 15   | 0.1         | 0.06        | 0.26        | 36          | 35          | 2         | 0.2  | 3   | 0.22        | 0.03        | 0.06       |
| <b>Analytical Value</b>               | 5261         | -    | 9.9         | 1.12        | 5.64        | 1066        | 1057        | 86        | 4.4  | 95  | 0.76        | 0.13        | 0.40       |
| <b>95% CI</b>                         | 4202 – 6302  | -    | 7.9 – 11.9  | 0.67 – 1.57 | 3.38 – 7.90 | 852 – 1281  | 844 – 1269  | 51 – 120  | -    | -   | -           | -           | -          |
| Serum Seronorm L2 – lot 1309416       |              |      |             |             |             |             |             |           |      |     |             |             |            |
|                                       | Li           | B    | Mn          | Co          | Ni          | Cu          | Zn          | Se        | Rb   | Sr  | Mo          | Cd          | Pb         |
| <b>n</b>                              | 3            | 3    | 3           | 3           | 3           | 3           | 3           | 3         | 3    | 3   | 3           | 3           | 3          |
| <b>Mean</b>                           | 9038         | 72.5 | 13.8        | 2.81        | 9.2         | 1722        | 1451        | 134       | 8.6  | 101 | 1.24        | 0.14        | 0.51       |
| <b>SD</b>                             | 73           | 9.1  | 0.4         | 0.15        | 0.7         | 95          | 51          | 2         | 0.1  | 4   | 0.07        | 0.04        | 0.05       |
| <b>Analytical Value</b>               | 9689         | 82.1 | 14.5        | 3.05        | 9.0         | 1925        | 1532        | 136       | 8.6  | 110 | 1.21        | 0.14        | 0.66       |
| <b>95% CI</b>                         | 7739 – 11639 | -    | 11.6 – 19.4 | 2.13 – 3.97 | 7.9 – 11.9  | 1538 – 2312 | 1223 – 1840 | 95 – 176  | -    | -   | -           | -           | -          |

Table S2. Limits of Detection (µg/L).

|                    | <b>Li</b> | <b>B</b> | <b>Mn</b> | <b>Co</b> | <b>Ni</b> | <b>Cu</b> | <b>Zn</b> | <b>Se</b> | <b>Rb</b> | <b>Sr</b> | <b>Mo</b> | <b>Cd</b> | <b>Pb</b> |
|--------------------|-----------|----------|-----------|-----------|-----------|-----------|-----------|-----------|-----------|-----------|-----------|-----------|-----------|
| <b>Serum</b>       | 0.042     | 1.0      | 0.061     | 0.015     | 0.099     | 0.13      | 0.50      | 3.1       | 0.049     | 0.052     | 0.036     | 0.011     | 0.006     |
| <b>Whole Blood</b> | 0.019     | 0.63     | 0.055     | 0.018     | 0.23      | 0.15      | 0.80      | 3.2       | 0.073     | 0.029     | 0.039     | 0.028     | 0.024     |
